# Supplementary material for: Emergence of mcr-9.1 in Extended-Spectrum-β-Lactamase-Producing Clinical Enterobacteriaceae in Pretoria, South Africa: Global Evolutionary Phylogenomics, Resistome, and Mobilome
Source: PubMed Central journal article supplement (PMC7253365; doi:10.1128/msystems.00148-20), 2020-05-19

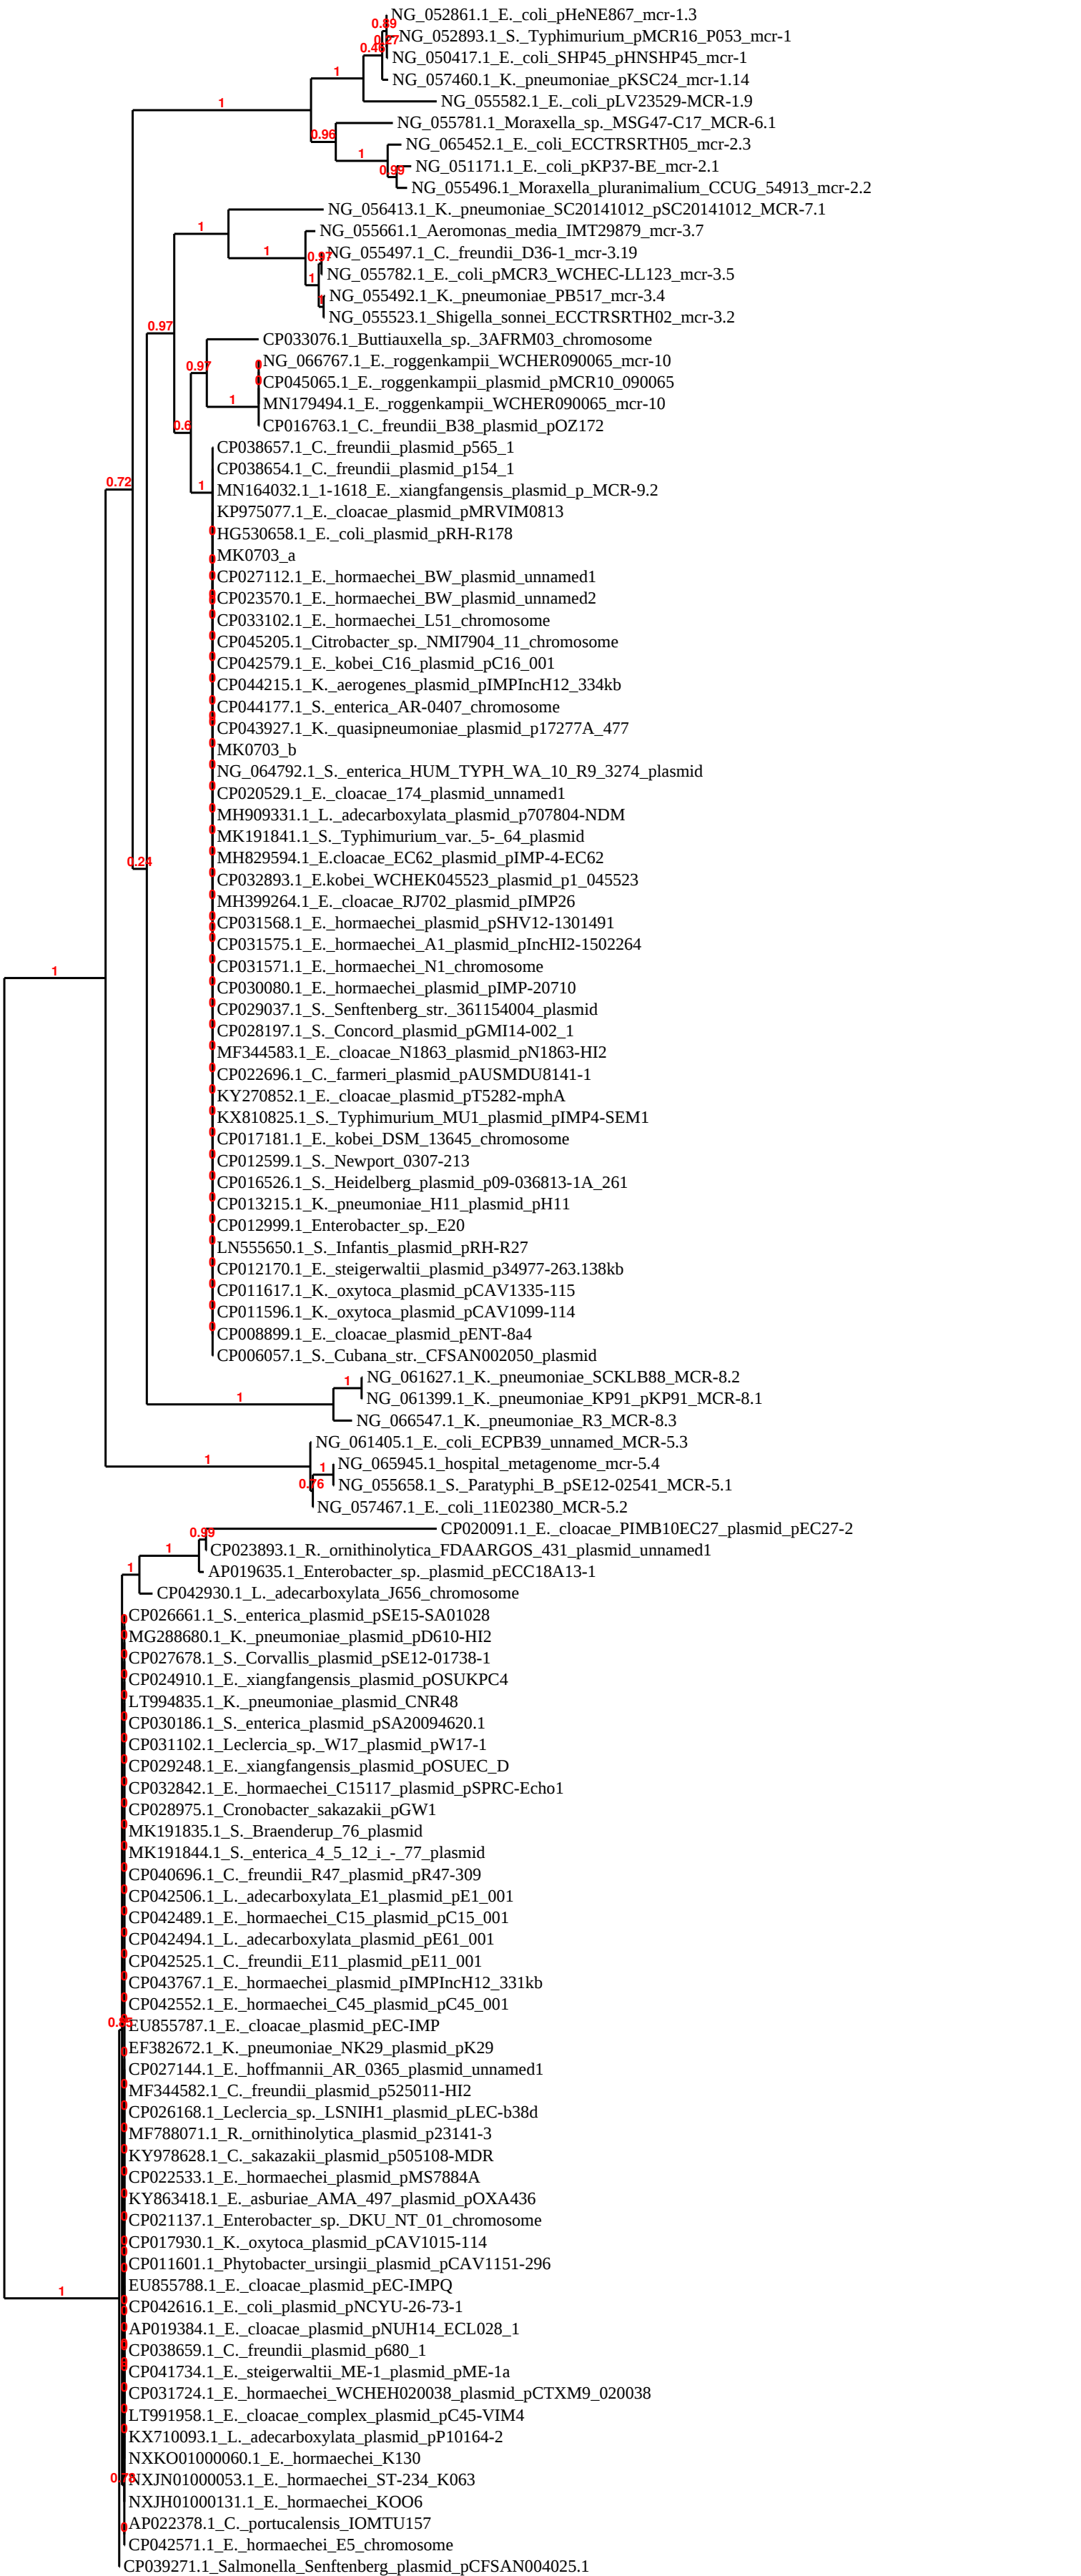

Supplement: mSystems.00148-20-sf001.pdf [file mSystems.00148-20-sf001.pdf]
